# Supplementary material for: Real-Time Imaging of DNA Damage in Yeast Cells Using Ultra-Short Near-Infrared Pulsed Laser Irradiation
Source: PubMed Central journal article supplement (PMC4237433; doi:10.1371/journal.pone.0113325), 2014-11-19
Supplement: pone.0113325.s004.pdf [file pone.0113325.s004.pdf]

**Table S1.** Strains used in this work.

---

***Yeast strains used***

---

|      |           |                                     |                       |                        |
|------|-----------|-------------------------------------|-----------------------|------------------------|
| 1304 | <i>h+</i> | <i>leu1-32</i>                      | <i>ura4::pcn1-GFP</i> |                        |
| 1821 | <i>h-</i> | <i>leu1-32</i>                      | <i>ura4-D18</i>       | <i>hht2-GFP::ura4</i>  |
| 1992 | <i>h+</i> | <i>ade6-216</i>                     | <i>leu1-32</i>        | <i>rad11-GFP::kanR</i> |
| 3257 | <i>h+</i> | <i>dis1prom-GFP-lacI-NLS::his7+</i> |                       |                        |

---
