# Supplementary material for: Real-Time Imaging of DNA Damage in Yeast Cells Using Ultra-Short Near-Infrared Pulsed Laser Irradiation
Source: PubMed Central journal article supplement (PMC4237433; doi:10.1371/journal.pone.0113325), 2014-11-19
Supplement: pone.0113325.s005.pdf [file pone.0113325.s005.pdf]

```
# Long_movies_plugin author Alfonso Garcia Ulloa
# Real-time imaging of DNA damage in yeast cells using ultra-short
# near-infrared pulsed laser irradiation
# Estrella Guarino, Gheorghe Cojoc, Alfonso García Ulloa,
# Iva M. Tolić and Stephen E. Kearsey
# compiled code available from
# https://dl.dropboxusercontent.com/u/606434/plugins/Long_movies_plugin.py
```

```
# Loading necessary libraries
from java.lang import InterruptedException, Runnable, Thread
from java.beans import PropertyChangeListener
from java.util import Random
from java.util.concurrent import ExecutionException
from javax.swing import SwingWorker, SwingUtilities
from javax.swing import BorderLayout
from java.awt import Toolkit as awtToolkit
from java.awt import BorderLayout as awtBorderLayout
from java.awt import Cursor as awtCursor
from java.awt import Insets as awtInsets
from javax.swing import JLabel, JFileChooser, JProgressBar, JPanel, JButton,
JFrame, JDesktopPane, JTextField, SwingConstants, JCheckBox
from java.awt import Component, GridLayout
from java.awt.event import MouseAdapter
import math, os, sys, copy
from ij.measure import CurveFitter
from ij.io import FileSaver
from math import atan2, degrees
from ij.plugin import Converter
from ij.plugin import ZProjector as ZP
from ij.plugin import Slicer as Sl
from ij.plugin.filter import Binary, RankFilters, GaussianBlur
from ij.plugin import ChannelSplitter as CS
from ij.gui import Roi, ProfilePlot, ShapeRoi
from java.awt import Color, Dimension
from java.io import File
from time import sleep
import timeit
from java.awt.geom import Ellipse2D
```

```
#####
#Swing Workers, all the action happens in the background
#####
class Load(SwingWorker):
```

```
    def __init__(self, gui):
        self.gui = gui
        SwingWorker.__init__(self)
```

```
    def doInBackground(self):
```

```
        od = OpenFileDialog("Choose a file", None)
        global filename
        filename = od.getFileName()
```

```

if filename is None:
    print "User canceled the dialog!"
else:
    global directory
    directory = od.getDirectory()
    filepath = directory + filename
    print "Selected file path:", filepath
    global impl,imp2,plotprof
    IJ.run("Bio-Formats Importer", "open=["+filepath+"] autoscale
color_mode=Colorized view=Hyperstack stack_order=XYZCT")
    IJ.run("Green Fire Blue")
    impl= WindowManager.getCurrentImage()
    imp2=impl.duplicate()
    if impl.getBitDepth()!=8:
        StackConverter(impl).convertToGray8()
    IJ.setTool('line')
    IJ.makeLine(0,0,1,1)
    IJ.run('Plot Profile')
    plotprof=WindowManager.getCurrentImage()
    print impl.getID()
    IJ.selectWindow(impl.getID())

```

```

def done(self):
    try:
        self.get() #raise exception if abnormal completion
        awtToolkit.getDefaultToolkit().beep()

        self.gui.loadButton.enabled = True
        self.gui.cursor = None #turn off the wait cursor
    except ExecutionException, e:
        awtToolkit.getDefaultToolkit().beep()

        self.gui.loadButton.enabled = True
        self.gui.cursor = None #turn off the wait cursor
        raise e.getCause()

```

```

#####
class Task(SwingWorker):

```

```

    def __init__(self, gui):
        self.gui = gui
        SwingWorker.__init__(self)

    def doInBackground(self):
        plotprof.close()
        threshold = int(self.gui.tresholdField.text)
        Hm= int(self.gui.HmField.text)
        Hr= int(self.gui.HrField.text)
        tol= int(self.gui.tolField.text)
        tic=timeit.default_timer()
        ip1=impl.getProcessor()
        Width=impl.getWidth()
        Height=impl.getHeight()
        impl.setSlice(1)
        A=ip1.getIntArray()

```

```

def IsHoodMin(A,x,y,W,H,Tol):
    if not (x-Tol<0 or x+Tol+1>W or y-Tol<0 or y+Tol+1>H):
        minV=A[x][y]
        for i in range(x-Tol,x+Tol+1):
            for j in range(y-Tol,y+Tol+1):
                minV=min(minV,A[i][j])
        if minV==A[x][y]:
            return True
        else:
            return False

    else:
        return 'error',x,y,x-1<0,x+2>W ,y-1<0,y+2>H
def HoodMean(A,x,y,W,H,HoodRadius):
    if not (x-HoodRadius<0 or x+HoodRadius+1>W or y-HoodRadius<0
or y+HoodRadius+1>H):
        mean=0
        for i in range(x-HoodRadius,x+1+HoodRadius):
            for j in range(y-HoodRadius,y+1+HoodRadius):
                mean=mean+A[i][j]
        return mean/9.0
    else:
        return 0

def HoodMin(A,x,y,W,H,HoodRadius,ip):
    if not (x-HoodRadius<0 or x+HoodRadius+1>W or y-HoodRadius<0
or y+HoodRadius+1>H):
        minV=A[x][y]
        for i in range(x-HoodRadius,x+HoodRadius+1):
            for j in range(y-HoodRadius,y+HoodRadius+1):
                minV=min(minV,A[i][j])
        for i in range(x-HoodRadius,x+HoodRadius+1):
            for j in range(y-HoodRadius,y+HoodRadius+1):
                if minV+1>A[i][j] and minV-1<A[i][j] and
A[i][j]>27 and A[i][j]<255:
                    ip.setColor(255)
                    ip.drawPixel(i,j)
    def HoodMax(A,x,y,W,H,tr,HoodRadius,Hmt,tolerance,ip,ip2):
        if not (x-HoodRadius<0 or x+HoodRadius+1>W or y-HoodRadius<0
or y+HoodRadius+1>H):
            maxV=A[x][y]
            for i in range(x-HoodRadius,x+HoodRadius+1):
                for j in range(y-HoodRadius,y+HoodRadius+1):
                    maxV=max(maxV,A[i][j])
            for i in range(x-HoodRadius,x+HoodRadius+1):
                for j in range(y-HoodRadius,y+HoodRadius+1):
                    if maxV+tolerance>A[i][j] and maxV-
tolerance<A[i][j] and A[i][j]>tr and A[i][j]<255 and
HoodMean(A,i,j,W,H,HoodRadius)>Hmt:
                        ip1.setColor(255)
                        ip1.drawPixel(i,j)

        else:
            return 'error',x,y,x-1<0,x+2>W ,y-1<0,y+2>H
#print treshold,Width,Height,impl.getStackSize()

```

```

ResultLayer=imp2

RLip=ResultLayer.getProcessor()

#print ResultLayer,RLip

for slice in range(1,imp1.getStackSize()+1):
    #print slice
    imp1.setSlice(slice)
    ResultLayer.setSlice(slice)
    A=ip1.getIntArray()
    toc=timeit.default_timer()
    #print toc
    IJ.showStatus(str(slice)+'/'+str(imp1.getStackSize())+'
Elapsed time: '+str((toc - tic)/60.0))
    IJ.showProgress(slice, imp1.getStackSize())
    for i in range(1,Width-2):
        for j in range(1,Height-2):

            HoodMax(A,i,j,Width,Height,treshold,Hr,Hm,tol,ip1,RLip)
            RLip.setThreshold(200, 255, ImageProcessor.NO_LUT_UPDATE)
            #ResultLayer.show()
            self.super__setProgress(int(slice/imp1.getStackSize()*100))
            toc=timeit.default_timer()
            print (toc - tic)/60.0 #elapsed time in seconds
            IJ.showStatus('FIN')
            #FileSaver(ResultLayer).saveAsTiffStack(directory+filename[:-
4]+'Track'+filename[-4:])
            FileSaver(imp1).saveAsTiffStack(directory+filename[:-
4]+'Track'+filename[-4:])
            #ResultLayer.show()
            cal=imp1.getCalibration()
            def doSomething(imp,loc):
                """ A function to react to a mouse click on an image canvas.
                """
                #print "clicked on: " ,imp
                #print loc.getX(),loc.getY()
                #print cal.getX(loc.getX()),cal.getX(loc.getY())
                self.gui.xtrackField.text=str(cal.getX(loc.getX()))
                self.gui.ytrackField.text=str(cal.getX(loc.getY()))
                ip=imp.getProcessor()

                if self.gui.checkbox.isSelected():
                    if ip.getPixel(int(loc.getX()),int(loc.getY()))>250:
                        ip.setColor(0)
                        ip.drawPixel(int(loc.getX()),int(loc.getY()))

            FileSaver(imp).saveAsTiffStack(directory+filename[:-4]+'Track'+filename[-
4:])

            else:
                ip.setColor(255)
                ip.drawPixel(int(loc.getX()),int(loc.getY()))

```

```

FileSaver(imp).saveAsTiffStack(directory+filename[:-4]+'Track'+filename[-
4:])
    class ML(MouseAdapter):
        def mousePressed(self, event):
            canvas = event.getSource()
            imp = canvas.getImage()
            loc= canvas.getCursorLoc()
            doSomething(imp,loc)

    listener = ML()

    #for imp in map(WindowManager.getImage, WindowManager.getIDList()):
    win = impl.getWindow()
    win.getCanvas().addMouseListener(listener)
    IJ.setTool("oval")
    ...

    table1 = ResultsTable()
    roiM = RoiManager(True)
    pa = ParticleAnalyzer(ParticleAnalyzer.ADD_TO_MANAGER,
Measurements.AREA | Measurements.CENTROID| Measurements.ELLIPSE|
Measurements.CIRCULARITY| Measurements.SLICE| Measurements.RECT, table1, 3,
Double.POSITIVE_INFINITY, 0.0, 1.0)
    pa.setHideOutputImage(True)
    pa.setRoiManager(roiM)
    for i in range(impl.getStackSize()):
        impl.setSlice(i+1)
        if pa.analyze(impl):
            print "All ok"
        else:
            print "There was a problem in analyzing"
    a = table1.getColumn(0)
    frame = table1.getColumn(27)
    X = table1.getColumn(6)
    Y = table1.getColumn(7)
    Major = table1.getColumn(15)
    Minor = table1.getColumn(16)
    bx = table1.getColumn(11)
    by = table1.getColumn(12)
    angle = table1.getColumn(31)
    Circ = table1.getColumn(18)
    w= table1.getColumn(13)
    h = table1.getColumn(14)
    #print a,b
    print filename

    means = []
    for roi in roiM.getRoisAsArray():
        imp2.setRoi(roi)
        stats = imp2.getStatistics(Measurements.MEAN)
        means.append(stats.mean)
    print len(means)

    name=filename[:-4]+'_K.txt'
    filepath1 = str(od.getDirectory()+name

```

```

    print filepath1,name
    o = open(filepath1,"wb") #open for write
    line='%header SPB1 Track
\n%i\tA\tMeanGrayValue\tX\tY\tBx\tBy\tMajor\tWidth\tCircularity\n'
    o.write(line)

    for i in range(len(a)):

        line=str(int(frame[i]))+'\t'+str(a[i])+'\t'+str(means[i])+'\t'+str(X[i])+
\t'+str(Y[i])+'\t'+str(bx[i])+'\t'+str(by[i])+'\t'+str(Major[i])+'\t'+str(w[i])+
'\t'+str(Circ[i])+'\n'
            o.write(line)

    o.write(str(i))
    o.close()
    '''

```

```

def done(self):
    try:
        self.get() #raise exception if abnormal completion
        awtToolkit.getDefaultToolkit().beep()

        self.gui.startButton.enabled = True
        self.gui.cursor = None #turn off the wait cursor
    except ExecutionException, e:
        awtToolkit.getDefaultToolkit().beep()

        self.gui.startButton.enabled = True
        self.gui.cursor = None #turn off the wait cursor
        raise e.getCause()

```

```
#####
```

```
class Task2(SwingWorker):
```

```

    def __init__(self, gui):
        self.gui = gui
        SwingWorker.__init__(self)

```

```

    def doInBackground(self):

```

```

        def graficar(name,LabelA,A):
            import org.jfree.data.xy.DefaultXYDataset as DefaultXYDataset
            import org.jfree.chart.renderer.xy.XYSplineRenderer as
XYSplineRenderer
            import org.jfree.chart.axis.NumberAxis as NumberAxis
            import org.jfree.chart.plot.XYPlot as XYPlot
            import org.jfree.chart.JFreeChart as JFreeChart
            import org.jfree.chart.ChartFactory as ChartFactory
            import org.jfree.chart.plot.PlotOrientation as PlotOrientation
            import org.jfree.ui.RectangleInsets as RectangleInsets
            import java.awt.Font as Font
            from java.awt import geom,Color,BasicStroke
            from org.jfree.chart.plot import CombinedDomainXYPlot

```

```

from org.jfree.chart.axis import AxisLocation
import org.jfree.chart.JFreeChart as JFreeChart
import org.jfree.chart.renderer.xy.XYLineAndShapeRenderer as
XYLineAndShapeRenderer

```

```

dataset = DefaultXYDataset()
dataset.addSeries("Series1", A)
#dataset1 = DefaultXYDataset()

```

```

renderer = XYLineAndShapeRenderer()
renderer.setSeriesStroke(0, BasicStroke(1))
#xax = NumberAxis("x")
#yax = NumberAxis("y")
#plot = XYPlot(dataset, None, yax, spline)

```

```

chart=ChartFactory.createXYLineChart(name,
                                     'Time [frame]',
                                     LabelA,
                                     dataset,
                                     PlotOrientation.VERTICAL,
                                     False,
                                     True,
                                     False)

```

```

chart.getTitle().setFont( Font("Dialog", Font.BOLD, 30) )

```

```

size =5.0
delta = size / 2.0;
shapel = geom.Rectangle2D.Double(-delta, -delta, size, size)
renderer.setSeriesShape(0, shapel)

```

```

chart.setBackgroundPaint(Color.white)
plot = chart.getPlot()
plot.setBackgroundPaint(Color.white)
plot.setRangeGridlinesVisible(True)
plot.setAxisOffset(RectangleInsets.ZERO_INSETS)
axis = plot.getRangeAxis()
axis2 = plot.getDomainAxis()
font = Font("Dialog", Font.BOLD, 20)
axis2.setTickLabelFont(font)
axis2.setLabelFont(font)
axis.setLabelFont(font)
axis.setTickLabelFont(font)
axis.setLabelPaint(Color.blue)
axis.setTickLabelPaint(Color.blue)
axis2.setLabelPaint(Color.black)
axis2.setTickLabelPaint(Color.black)
#plot.setRangeAxis(1, axis3)
#plot.setDataset(1, dataset1 )
#plot.mapDatasetToRangeAxis(1, 1)

plot.setDomainGridlinesVisible(True)

```

```

        plot.setRangeGridlinesVisible(True)
        plot.setRangeGridlinePaint(Color.black)
        plot.setDomainGridlinePaint(Color.black)
        rangeAxis = plot.getRangeAxis()

rangeAxis.setStandardTickUnits(NumberAxis.createIntegerTickUnits())
        rangeAxis.setAutoRangeIncludesZero(False)
        #rangeAxis.setRange(0, maxY*1.10)
        plot.setRenderer(0,renderer)
        renderer.setSeriesPaint(0, Color.blue)
        bi = chart.createBufferedImage(1200, 800)
        imp = ImagePlus("Results", bi)
        imp.show()

ROI1=imp1.getRoi()
print ROI1
rect=ROI1.getBounds()
print rect
print rect.x
print rect.y
print rect.width
print rect.height
imp2.show()
#imp2=WindowManager.getImage(WindowManager.getIDList()[0])
xt= float(self.gui.xtrackField.text)
yt= float(self.gui.ytrackField.text)
#imp1 = WindowManager.getImage(WindowManager.getIDList()[1])
cal=imp2.getCalibration()
ip2=imp2.getProcessor()
imgW=imp2.getWidth()
imgH=imp2.getHeight()
W=4
H=4
SL=imp2.getImageStackSize()
A=ip2.getIntArray()
xr=int(rect.x+rect.width/2.0)
yr=int(rect.y+rect.height/2.0)

def IMGmax(A,xr,yr):
    MAXV=[0]
    MAXloc=[]
    maximo=0
    for i in range(xr-5,xr+5):
        for j in range(yr-5,yr+5):
            if A[i][j]>maximo:
                maximo=A[i][j]
                MAXloc.append([i,j])
                #MAXV.append(max(A[i]))
                #MAXloc.append([i,A[i].index(max(A[i]))])
    #print MAXV,MAXloc
    #print max(MAXV)

```

```

        #print MAXloc[MAXV.index(max(MAXV))]
        X=MAXloc[-1][0]
        Y=MAXloc[-1][1]
        return X,Y

def Mean(A,x,y,W,H):
    mean=0
    for i in range(x,x+W):
        for j in range(y,y+H):
            mean=mean+A[i][j]
            #print i,j,A[i][j]
    return mean/(1.0*W*H)
def optimize(A,X,Y,W,H):
    meansloc=[]
    means=[]
    for xi in range(W):
        for yi in range(H):
            #print X-xi,Y-yi
            means.append(Mean(A,X-xi,Y-yi,W,H))
            meansloc.append([X-xi,Y-yi])
    return meansloc[means.index(max(means))]
IntDen=[]
area=[]
average=[]

for i in range(1,SL+1,1):
    imp2.setSlice(i)
    ip2=imp2.getProcessor()
    A=ip2.getIntArray()
    X,Y=IMGmax(A,xr,yr)
    xr=X
    yr=Y
    ROI=ShapeRoi(Ellipse2D.Float(X-5/2.0,Y-5/2.0, 5, 5))

    #loc=optimize(A,X,Y,W,H)
    #ROI=Roi(loc[0],loc[1],W,H)
    print ROI
    imp2.setRoi(ROI)
    stats = imp2.getStatistics()
    IntDen.append(stats.mean*3.1415*5)
    area.append(stats.area)
    average.append(stats.mean)
#print IntDen,area

name=filename[:-4]+'_abl_region.txt'
filepath1 = directory+name

print filepath1,name
o = open(filepath1,"wb") #open for write
line='%header Ablation Tracker
\n%frame\tArea\tIntDen\tMeanGrayValue\n'
o.write(line)
XVA=range(1,len(area)+1)

```

```

        for i in range(len(area)):
line=str(i+1)+'\t'+str(area[i])+'\t'+str(IntDen[i])+'\t'+str(average[i])+
\n'
            o.write(line)

o.close()

graficar('ablation ', 'Intensity[AU]', [XVA, IntDen])

table1 = ResultsTable()
roiM = RoiManager(True)
pa = ParticleAnalyzer(ParticleAnalyzer.ADD_TO_MANAGER,
Measurements.AREA | Measurements.CENTROID | Measurements.ELLIPSE |
Measurements.CIRCULARITY | Measurements.SLICE | Measurements.RECT, table1, 8,
Double.POSITIVE_INFINITY, 0.0, 1.0)
pa.setHideOutputImage(True)
pa.setRoiManager(roiM)

print 'flag1'
for i in range(impl.getStackSize()):
    impl.setSlice(i+1)
    ip1=impl.getProcessor()
    ip1.setThreshold(200, 255, ImageProcessor.NO_LUT_UPDATE)
    pa.analyze(impl)
a = table1.getColumn(0)
frame = table1.getColumn(27)
X = table1.getColumn(6)
Y = table1.getColumn(7)
Major = table1.getColumn(15)
Minor = table1.getColumn(16)
bx = table1.getColumn(11)
by = table1.getColumn(12)
angle = table1.getColumn(31)
Circ = table1.getColumn(18)
w = table1.getColumn(13)
h = table1.getColumn(14)
#print a,b
cal=impl.getCalibration()
#xt=cal.getX(xt)
#yt=cal.getY(yt)
Tracklist=[]
print 'flag2'

...
for i in range(len(X)):

    if xt+cal.getX(15)>X[i] and xt-cal.getX(15)<X[i] and yt-
cal.getY(15)<Y[i] and yt+cal.getY(15)>Y[i]:
        Tracklist.append(i)
        xt=X[i]
        yt=Y[i]
...

```

```

    for i in range(len(X)):
        if
ROI1.contains(int(cal.getRawX(X[i])),int(cal.getRawY(Y[i]))):
            Tracklist.append(i)

print Tracklist
means = []
print len(roiM.getRoisAsArray())
for roi in roiM.getRoisAsArray():
    imp2.setSlice(roi.getPosition())
    imp2.setRoi(roi)
    stats = imp2.getStatistics(Measurements.MEAN)
    means.append(stats.mean)
print len(means)

name=filename[:-4]+'_nucleus_intensity.txt'
filepath1 = directory+name
print filepath1,name
o = open(filepath1,"wb") #open for write
line='%header Nucleus Tracker \n%i\tA\tRawIntDen\tMean\tX\tY\n'
o.write(line)

mframe=[]
ma=[]
mmeans=[]
mX=[]
mY=[]
for i in Tracklist:
    if frame.count(frame[i])>1:
        if mframe[-1]<frame[i]:
            mframe.append(frame[i])
            ma.append(a[i])
            mmeans.append(means[i])
            mX.append(X[i])
            mY.append(Y[i])
        if mframe[-1]==frame[i]:
            ma[-1]=ma[-1]+a[i]
            mmeans[-1]=(mmeans[-1]+means[i])/2.0
            mX[-1]=(mX[-1]+X[i])/2.0
            mY[-1]=(mY[-1]+Y[i])/2.0
    elif frame.count(frame[i])==1:
        mframe.append(frame[i])
        ma.append(a[i])
        mmeans.append(means[i])
        mX.append(X[i])
        mY.append(Y[i])

YVA=[]
for i in range(len(mframe)):

    line=str(int(mframe[i]))+'\t'+str(round(ma[i],3))+'\t'+str(round(mmeans[i]
*ma[i]/(cal.getX(1)*cal.getY(1)),3))+'\t'+str(round(mmeans[i],3))+'\t'+str(round
(mX[i],3))+'\t'+str(round(mY[i],3))+'\n'
        YVA.append(round(mmeans[i]*ma[i]/(cal.getX(1)*cal.getY(1)),3))

```

```

        o.write(line)

o.close()
print len(mframe),len(ma),len(mmeans),len(mX),len(mY)

graficar('Nucleus','Intensity[AU]',[mframe,YVA])

def done(self):
    try:
        self.get() #raise exception if abnormal completion
        awtToolkit.getDefaultToolkit().beep()

        self.gui.startTrackButton.enabled = True
        self.gui.cursor = None #turn off the wait cursor
    except ExecutionException, e:
        awtToolkit.getDefaultToolkit().beep()

        self.gui.startTrackButton.enabled = True
        self.gui.cursor = None #turn off the wait cursor
        raise e.getCause()

#####

#####
class Task3(SwingWorker):

    def __init__(self, gui):
        self.gui = gui
        SwingWorker.__init__(self)

    def doInBackground(self):

        od = OpenFileDialog("Choose a file", None)
        global filename
        filename = od.getFileName()
        if filename is None:
            print "User canceled the dialog!"
        else:
            global directory
            directory = od.getDirectory()
            filepath = directory + filename
            filepath2= directory + filename[:-4]+'Track'+filename[-4:]
            print "Selected file path:", filepath
            global imp1,imp2
            IJ.run("Bio-Formats Importer", "open=["+filepath+"] autoscale
color_mode=Colorized view=Hyperstack stack_order=XYCZT")
            imp2= WindowManager.getCurrentImage()
            IJ.run("Bio-Formats Importer", "open=["+filepath2+"] autoscale
color_mode=Colorized view=Hyperstack stack_order=XYCZT")
            imp1= WindowManager.getCurrentImage()

```

```

cal=impl.getCalibration()
def doSomething(imp,loc):
    """ A function to react to a mouse click on an image canvas.
    """
    #print "clicked on: " ,imp
    #print loc.getX(),loc.getY()
    #print cal.getX(loc.getX()),cal.getY(loc.getY())
    self.gui.xtrackField.text=str(cal.getX(loc.getX()))
    self.gui.ytrackField.text=str(cal.getY(loc.getY()))
    ip=imp.getProcessor()

    if self.gui.checkbox.isSelected():
        if ip.getPixel(int(loc.getX()),int(loc.getY()))>250:
            ip.setColor(0)
            ip.drawPixel(int(loc.getX()),int(loc.getY()))

FileSaver(imp).saveAsTiffStack(directory+filename[:-4]+'Track'+filename[-
4:])
    else:
        ip.setColor(255)
        ip.drawPixel(int(loc.getX()),int(loc.getY()))

FileSaver(imp).saveAsTiffStack(directory+filename[:-4]+'Track'+filename[-
4:])

class ML(MouseAdapter):
    def mousePressed(self, event):
        canvas = event.getSource()
        imp = canvas.getImage()
        loc= canvas.getCursorLoc()
        doSomething(imp,loc)

listener = ML()

win = impl.getWindow()
win.getCanvas().addMouseListener(listener)

def done(self):
    try:
        self.get() #raise exception if abnormal completion
        awtToolkit.getDefaultToolkit().beep()

        self.gui.LoadTrackButton.enabled = True
        self.gui.cursor = None #turn off the wait cursor
    except ExecutionException, e:
        awtToolkit.getDefaultToolkit().beep()

        self.gui.LoadTrackButton.enabled = True
        self.gui.cursor = None #turn off the wait cursor
        raise e.getCause()

```

```
#####
```

```

#####
# Creating The GUI
#####
class KinetochoreTracker(JPanel, PropertyChangeListener):
    def __init__(self):
        JPanel.__init__(self, awtBorderLayout(),
            border = BorderFactory.createEmptyBorder(20, 20, 20,
20)
            )

        #Create the demo's UI.
        self.loadButton = JButton("Load", actionPerformed=self.loadPressed)
        self.startButton = JButton("Start",
actionPerformed=self.startPressed)
        self.ClearButton = JButton("Clear",
actionPerformed=self.clearPressed)
        self.startTrackButton = JButton("Start Track",
actionPerformed=self.startTrackPressed)
        self.LoadTrackButton = JButton("Load Track",
actionPerformed=self.LoadTrackPressed)
        self.progressBar = JProgressBar(0, 100, value=0, stringPainted=True)
        self.checkbox = JCheckBox( 'Editor Mode', selected=0,
itemStateChanged = self.cbTest );

        self.tresholdField = JTextField('100',15)
        self.HmField = JTextField('100',15)
        self.HrField = JTextField('1',15)
        self.tolField = JTextField('150',15)
        self.xtrackField = JTextField('0',15)
        self.ytrackField = JTextField('0',15)
        panel = JPanel(GridLayout(0,2))
        panel.add(self.loadButton)
        panel.add(JLabel("", SwingConstants.RIGHT))
        panel.add(self.startButton)
        panel.add(self.progressBar)
        panel.add(JLabel("Treshold:", SwingConstants.RIGHT))
        panel.add(self.tresholdField)
        panel.add(JLabel("HoodMean Treshold:", SwingConstants.RIGHT))
        panel.add(self.HmField)
        panel.add(JLabel("Hood radius:", SwingConstants.RIGHT))
        panel.add(self.HrField)
        panel.add(JLabel("Local Maxima Tolerance:", SwingConstants.RIGHT))
        panel.add(self.tolField)
        panel.add(self.startTrackButton)
        panel.add(self.LoadTrackButton)
        panel.add(JLabel("Aproximate X coordinate", SwingConstants.RIGHT))
        panel.add(self.xtrackField)
        panel.add(JLabel("Aproximate Y coordinate", SwingConstants.RIGHT))
        panel.add(self.ytrackField)
        panel.add(self.ClearButton)
        panel.add(JLabel("", SwingConstants.RIGHT))
        panel.add(self.checkbox)
        self.add(panel, awtBorderLayout.PAGE_START)

```

```

def cbTest( self, e ) :

    print self.checkbox.isSelected()

def startPressed(self, e):
    "Invoked when the user presses the start button"
    self.startButton.enabled = False
    self.cursor = awtCursor.getPredefinedCursor(awtCursor.WAIT_CURSOR)

    #Instances of javax.swing.SwingWorker are not reusable, so
    #we create new instances as needed.
    task = Task(self)
    task.addPropertyChangeListener(self)
    task.execute()

def clearPressed(self, e):
    "Invoked when the user presses the start button"

    IJ.run("Close All")

    #Instances of javax.swing.SwingWorker are not reusable, so
    #we create new instances as needed.

def loadPressed(self, e):
    self.loadButton.enabled = False
    self.cursor = awtCursor.getPredefinedCursor(awtCursor.WAIT_CURSOR)

    #Instances of javax.swing.SwingWorker are not reusable, so
    #we create new instances as needed.
    load = Load(self)
    load.addPropertyChangeListener(self)
    load.execute()

def startTrackPressed(self, e):
    "Invoked when the user presses the start button"
    self.startTrackButton.enabled = False
    self.cursor = awtCursor.getPredefinedCursor(awtCursor.WAIT_CURSOR)

    #Instances of javax.swing.SwingWorker are not reusable, so
    #we create new instances as needed.
    task2 = Task2(self)
    task2.addPropertyChangeListener(self)
    task2.execute()

def LoadTrackPressed(self, e):
    "Invoked when the user presses the start button"
    self.LoadTrackButton.enabled = False
    self.cursor = awtCursor.getPredefinedCursor(awtCursor.WAIT_CURSOR)

    #Instances of javax.swing.SwingWorker are not reusable, so
    #we create new instances as needed.
    task3 = Task3(self)
    task3.addPropertyChangeListener(self)
    task3.execute()

```

```

def propertyChange(self, e):
    # Invoked when task's progress property changes.
    if e.propertyName == "progress":
        self.progressBar.value = e.newValue

def createAndShowGUI():
    # Create the GUI and show it. As with all GUI code, this must run
    # on the event-dispatching thread.
    frame = JFrame("Nucleus Tracker FinalRev",
                    defaultCloseOperation = JFrame.DISPOSE_ON_CLOSE,
                    )
    frame.setBackground(Color.GRAY)
    #Create and set up the content pane.
    newContentPane = KinetochoreTracker()
    newContentPane.setOpaque(True)      #content panes must be opaque
    frame.contentPane = newContentPane

    #Display the window.
    frame.pack()
    frame.visible = True

#####
# Running the plug-in
#####
class Runnable(Runnable):
    def __init__(self, runFunction):
        self._runFunction = runFunction

    def run(self):
        self._runFunction()

#####
if __name__ == '__main__':
    SwingUtilities.invokeLater(Runnable(createAndShowGUI))

```
